# Supplementary material for: Oceanic crustal carbon cycle drives 26-million-year atmospheric carbon dioxide periodicities
Source: PubMed Central journal article supplement — Sci Adv. 2018 Feb 14;4(2):eaaq0500. doi: 10.1126/sciadv.aaq0500 (PMC5812735; doi:10.1126/sciadv.aaq0500), 2018-02-14
Supplement: aaq0500_SM.pdf [file aaq0500_SM.pdf]

## Supplementary Materials for **Oceanic crustal carbon cycle drives 26-million-year atmospheric carbon dioxide periodicities**

R. Dietmar Müller and Adriana Dutkiewicz

Published 14 February 2018, *Sci. Adv.* **4**, eaaq0500 (2018)

DOI: 10.1126/sciadv.aaq0500

### **This PDF file includes:**

- fig. S1. Modeled oceanic crustal CO<sub>2</sub> content through time.
- fig. S2. Paleo-age of the ocean crust.
- fig. S3. Modeled paleo-ocean bottom water temperature.

## Supplementary Materials

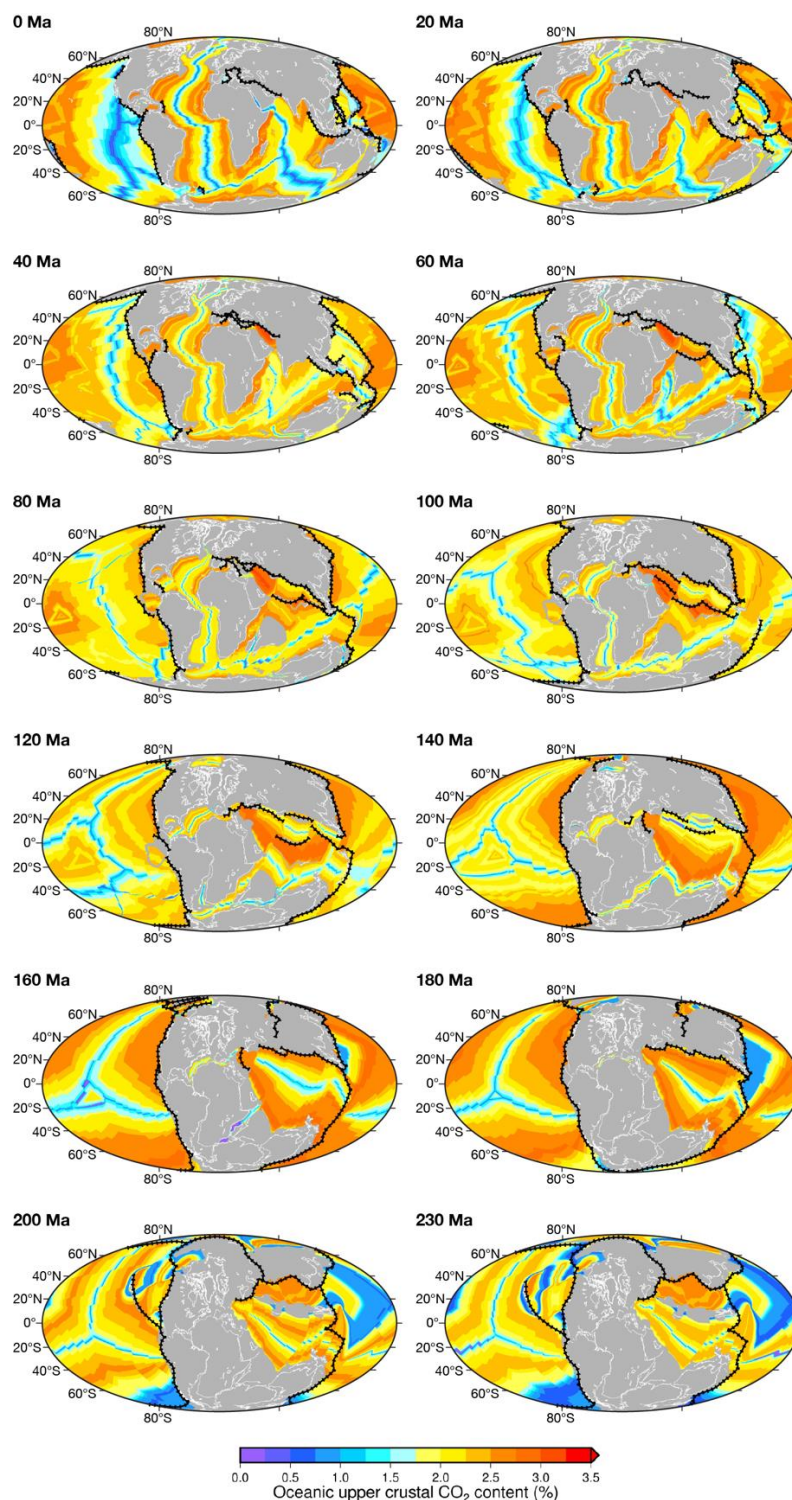

**fig. S1. Modeled oceanic crustal CO<sub>2</sub> content through time.** Crustal CO<sub>2</sub> content is plotted in 20 My intervals from 0–200 Ma, and at 230 Ma, and is based on a log-linear relationship between observed CO<sub>2</sub>, bottom water temperature and crustal age.

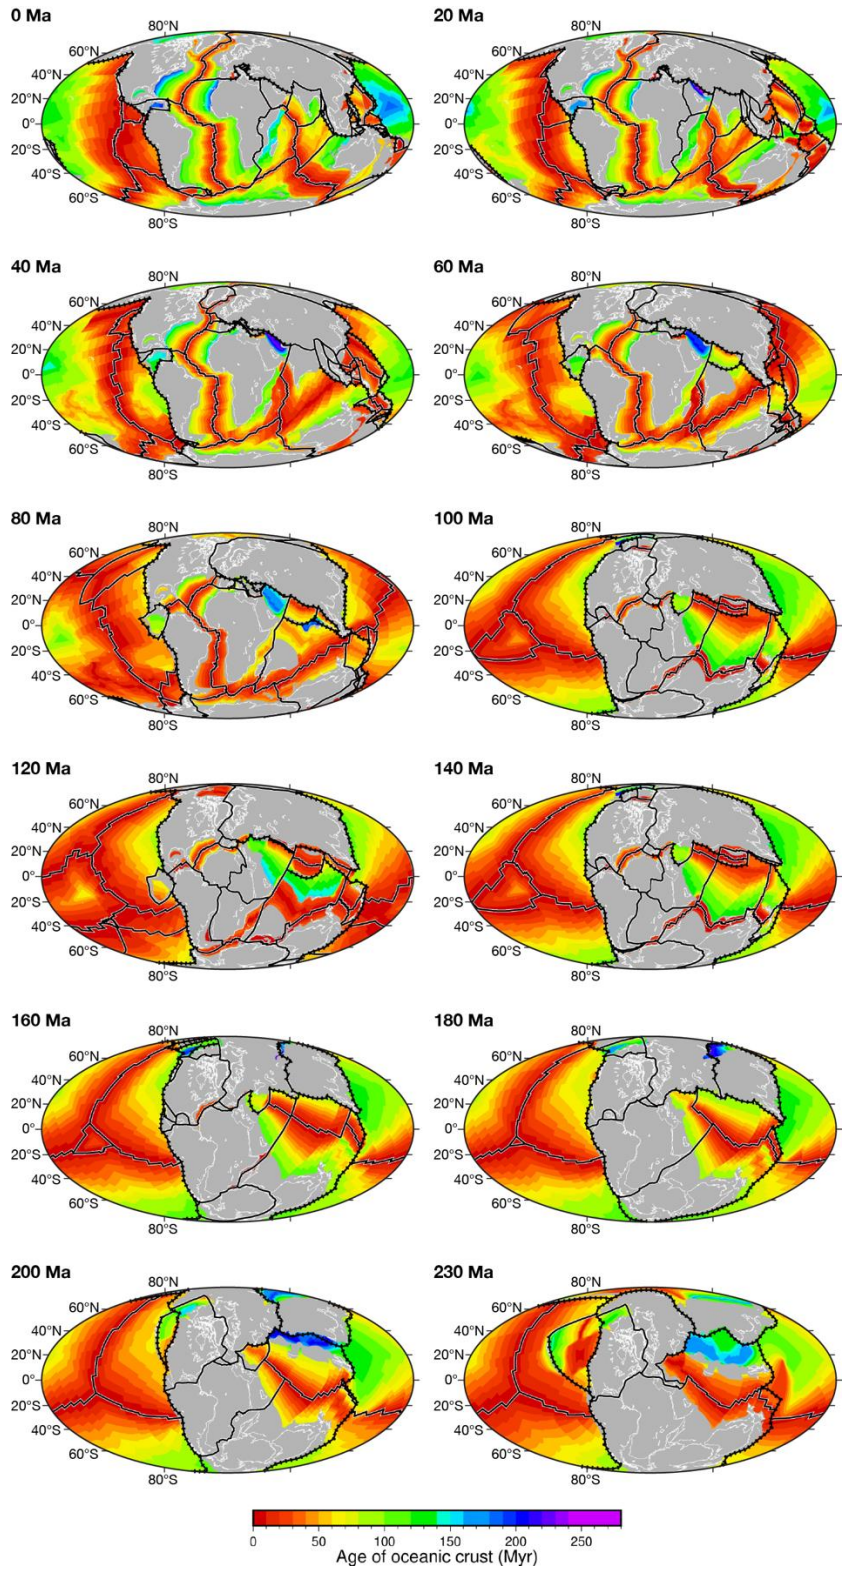

**fig. S2. Paleo-age of the ocean crust.** Crustal age is plotted in 20 My intervals from 0–200 Ma, and at 230 Ma.

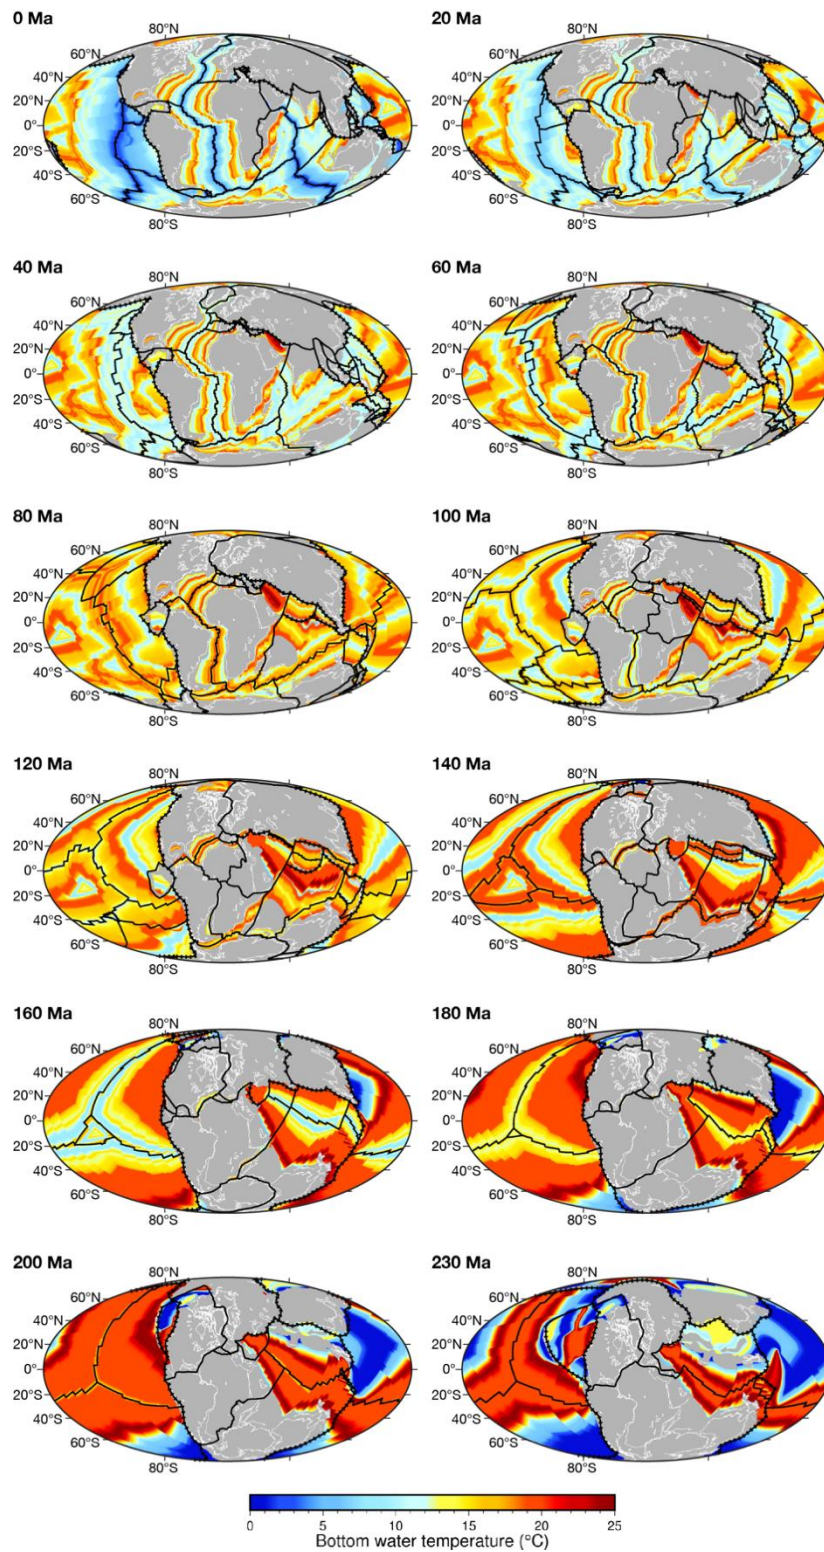

**fig. S3. Modeled paleo-ocean bottom water temperature.** The temperature shown is the paleo-bottom water temperature at the time of crustal accretion for any given parcel of ocean crust through time in 20 My intervals from 0–200 Ma, and at 230 Ma.
